# Supplementary material for: COVID-19 self-testing using antigen rapid diagnostic tests: Feasibility evaluation among health-care workers and general population in Malawi
Source: PubMed Central journal article supplement (PMC10381081; doi:10.1371/journal.pone.0289291), 2023-07-28

# PLOS ONE

## COVID-19 self-testing using antigen rapid diagnostic tests: feasibility evaluation among health-care workers and general population in Malawi --Manuscript Draft--

|                                |                                                                                                                                                                                                                                                                                                                                                                                                                                                                                                                                                                                                                                                                                                                                                                                                                                                                                                                                                                                                                                                                                                                                                                                                                                                                                                                                                                                                                                                                                                                                                                                                                                                                                                                                                                                                                                                                                                                                                                                                                                                                                                                                                                                                                                        |
|--------------------------------|----------------------------------------------------------------------------------------------------------------------------------------------------------------------------------------------------------------------------------------------------------------------------------------------------------------------------------------------------------------------------------------------------------------------------------------------------------------------------------------------------------------------------------------------------------------------------------------------------------------------------------------------------------------------------------------------------------------------------------------------------------------------------------------------------------------------------------------------------------------------------------------------------------------------------------------------------------------------------------------------------------------------------------------------------------------------------------------------------------------------------------------------------------------------------------------------------------------------------------------------------------------------------------------------------------------------------------------------------------------------------------------------------------------------------------------------------------------------------------------------------------------------------------------------------------------------------------------------------------------------------------------------------------------------------------------------------------------------------------------------------------------------------------------------------------------------------------------------------------------------------------------------------------------------------------------------------------------------------------------------------------------------------------------------------------------------------------------------------------------------------------------------------------------------------------------------------------------------------------------|
| <b>Manuscript Number:</b>      | PONE-D-22-25536                                                                                                                                                                                                                                                                                                                                                                                                                                                                                                                                                                                                                                                                                                                                                                                                                                                                                                                                                                                                                                                                                                                                                                                                                                                                                                                                                                                                                                                                                                                                                                                                                                                                                                                                                                                                                                                                                                                                                                                                                                                                                                                                                                                                                        |
| <b>Article Type:</b>           | Research Article                                                                                                                                                                                                                                                                                                                                                                                                                                                                                                                                                                                                                                                                                                                                                                                                                                                                                                                                                                                                                                                                                                                                                                                                                                                                                                                                                                                                                                                                                                                                                                                                                                                                                                                                                                                                                                                                                                                                                                                                                                                                                                                                                                                                                       |
| <b>Full Title:</b>             | COVID-19 self-testing using antigen rapid diagnostic tests: feasibility evaluation among health-care workers and general population in Malawi                                                                                                                                                                                                                                                                                                                                                                                                                                                                                                                                                                                                                                                                                                                                                                                                                                                                                                                                                                                                                                                                                                                                                                                                                                                                                                                                                                                                                                                                                                                                                                                                                                                                                                                                                                                                                                                                                                                                                                                                                                                                                          |
| <b>Short Title:</b>            | COVID-19 self-testing                                                                                                                                                                                                                                                                                                                                                                                                                                                                                                                                                                                                                                                                                                                                                                                                                                                                                                                                                                                                                                                                                                                                                                                                                                                                                                                                                                                                                                                                                                                                                                                                                                                                                                                                                                                                                                                                                                                                                                                                                                                                                                                                                                                                                  |
| <b>Corresponding Author:</b>   | Madalo Mukoka, MBBS, MSc Epidemiology<br>Kamuzu University of Health Sciences: University of Malawi College of Medicine<br>Blantyre, Malawi MALAWI                                                                                                                                                                                                                                                                                                                                                                                                                                                                                                                                                                                                                                                                                                                                                                                                                                                                                                                                                                                                                                                                                                                                                                                                                                                                                                                                                                                                                                                                                                                                                                                                                                                                                                                                                                                                                                                                                                                                                                                                                                                                                     |
| <b>Keywords:</b>               | SARS-CoV-2; Self-testing; Covid-19; Self-sampling; Antigen Rapid Diagnostic Tests                                                                                                                                                                                                                                                                                                                                                                                                                                                                                                                                                                                                                                                                                                                                                                                                                                                                                                                                                                                                                                                                                                                                                                                                                                                                                                                                                                                                                                                                                                                                                                                                                                                                                                                                                                                                                                                                                                                                                                                                                                                                                                                                                      |
| <b>Abstract:</b>               | <p><b>Background :</b> COVID-19 testing is critical for identifying cases to prevent transmission. SARS-CoV-2 self-testing has the potential to increase diagnostic testing capacity and to expand access to hard-to-reach areas in low-and-middle-income countries. We investigated the feasibility and acceptability of COVID-19 self-sampling and self-testing using SARS-CoV-2 Antigen-Rapid Diagnostic Tests (Ag-RDTs).</p> <p><b>Methods :</b> July 2021 to February 2022, we conducted a mixed-methods cross-sectional study examining self-sampling and self-testing using Standard Q and Panbio COVID-19 Ag Rapid Test Device in Urban and rural Blantyre, Malawi. Health care workers and adults (18y+) in the general population were systematically sampled.</p> <p><b>Results:</b> Overall, 1,330 participants were enrolled of whom 674 (56.0%) were female with 664 for self-sampling and 666 for self-testing. Mean age was 30.7y (standard deviation [SD] 9.6). Self-sampling usability threshold for Standard Q was 273/333 (82.0%: 95% CI 77.4% to 86.0%) and 261/331 (78.8%: 95% CI 74.1% to 83.1%) for Panbio. Self-testing threshold was 276/335 (82.4%: 95% CI 77.9% to 86.3%) and 300/332 (90.4%: 95% CI 86.7% to 93.3%) for Standard Q and Panbio, respectively. Agreement between self-sample results and professional test results was 325/325 (100%) and 322/322 (100%) for Standard Q and Panbio, respectively. For self-testing, agreement was 332/333 (99.7%: 95% CI 98.3 to 100%) for Standard Q and 330/330 (100%: 95% CI 99.8 to 100%) for Panbio. Odds of achieving self-sampling threshold increased if the participant was recruited from an urban site (odds ratio [OR] 2.15 95% CI 1.44 to 3.23, <math>P &lt; .01</math>). Compared to participants with primary school education those with secondary and tertiary achieved higher self-testing threshold OR 1.88 (95% CI 1.17 to 3.01), <math>P = .01</math> and 4.05 (95% CI 1.20 to 13.63), <math>P = .02</math>, respectively.</p> <p><b>Conclusions:</b> One of the first studies to demonstrate high feasibility of self-testing using SARS-CoV-2 Ag-RDTs in low- and middle-income countries potentially supporting large scale-up.</p> |
| <b>Order of Authors:</b>       | <p>Madalo Mukoka, MBBS, MSc Epidemiology</p> <p>Euphemia Sibanda, PhD</p> <p>Constancia Watadzaushe, BSc</p> <p>Moses Kumwenda, PhD</p> <p>Florence Abok, MA</p> <p>Elizabeth L Corbett, MD PhD</p> <p>Elena Ivanova, PhD</p> <p>Augustine Talumba Choko, PhD</p>                                                                                                                                                                                                                                                                                                                                                                                                                                                                                                                                                                                                                                                                                                                                                                                                                                                                                                                                                                                                                                                                                                                                                                                                                                                                                                                                                                                                                                                                                                                                                                                                                                                                                                                                                                                                                                                                                                                                                                      |
| <b>Additional Information:</b> |                                                                                                                                                                                                                                                                                                                                                                                                                                                                                                                                                                                                                                                                                                                                                                                                                                                                                                                                                                                                                                                                                                                                                                                                                                                                                                                                                                                                                                                                                                                                                                                                                                                                                                                                                                                                                                                                                                                                                                                                                                                                                                                                                                                                                                        |
| <b>Question</b>                | <b>Response</b>                                                                                                                                                                                                                                                                                                                                                                                                                                                                                                                                                                                                                                                                                                                                                                                                                                                                                                                                                                                                                                                                                                                                                                                                                                                                                                                                                                                                                                                                                                                                                                                                                                                                                                                                                                                                                                                                                                                                                                                                                                                                                                                                                                                                                        |
| <b>Financial Disclosure</b>    | This research was funded by UNITAID (grant number KFW P09022-00) through the                                                                                                                                                                                                                                                                                                                                                                                                                                                                                                                                                                                                                                                                                                                                                                                                                                                                                                                                                                                                                                                                                                                                                                                                                                                                                                                                                                                                                                                                                                                                                                                                                                                                                                                                                                                                                                                                                                                                                                                                                                                                                                                                                           |

|                                                                                                                                                                                                                                                                                                                                                                                                                                                                                                                                                                                                                                                                                                                                                                                                                                                                                                                                                                                                                                                                                                                                                                                                                                                                                                                                                  |                                                                                                                                                                                |
|--------------------------------------------------------------------------------------------------------------------------------------------------------------------------------------------------------------------------------------------------------------------------------------------------------------------------------------------------------------------------------------------------------------------------------------------------------------------------------------------------------------------------------------------------------------------------------------------------------------------------------------------------------------------------------------------------------------------------------------------------------------------------------------------------------------------------------------------------------------------------------------------------------------------------------------------------------------------------------------------------------------------------------------------------------------------------------------------------------------------------------------------------------------------------------------------------------------------------------------------------------------------------------------------------------------------------------------------------|--------------------------------------------------------------------------------------------------------------------------------------------------------------------------------|
| <p>Enter a financial disclosure statement that describes the sources of funding for the work included in this submission. Review the <a href="#">submission guidelines</a> for detailed requirements. View published research articles from <a href="#">PLOS ONE</a> for specific examples.</p> <p>This statement is required for submission and <b>will appear in the published article</b> if the submission is accepted. Please make sure it is accurate.</p> <p><b>Unfunded studies</b><br/>Enter: <i>The author(s) received no specific funding for this work.</i></p> <p><b>Funded studies</b><br/>Enter a statement with the following details:</p> <ul style="list-style-type: none"> <li>• Initials of the authors who received each award</li> <li>• Grant numbers awarded to each author</li> <li>• The full name of each funder</li> <li>• URL of each funder website</li> <li>• Did the sponsors or funders play any role in the study design, data collection and analysis, decision to publish, or preparation of the manuscript?</li> <li>• <b>NO</b> - Include this sentence at the end of your statement: <i>The funders had no role in study design, data collection and analysis, decision to publish, or preparation of the manuscript.</i></li> <li>• <b>YES</b> - Specify the role(s) played.</li> </ul> <p>* typeset</p> | <p>Foundation For Innovative New Diagnostics. The funder had no role in the study design, data collection, analysis, decision to publish or preparation of the manuscript.</p> |
| <p><b>Competing Interests</b></p> <p>Use the instructions below to enter a competing interest statement for this submission. On behalf of all authors, disclose any <a href="#">competing interests</a> that could be perceived to bias this work—acknowledging all financial support and any other relevant financial or non-financial competing interests.</p> <p>This statement is <b>required</b> for submission and <b>will appear in the published article</b> if</p>                                                                                                                                                                                                                                                                                                                                                                                                                                                                                                                                                                                                                                                                                                                                                                                                                                                                      | <p>The authors have declared that no competing interests exist.</p>                                                                                                            |

the submission is accepted. Please make sure it is accurate and that any funding sources listed in your Funding Information later in the submission form are also declared in your Financial Disclosure statement.

View published research articles from [PLOS ONE](#) for specific examples.

**NO authors have competing interests**

Enter: *The authors have declared that no competing interests exist.*

**Authors with competing interests**

Enter competing interest details beginning with this statement:

*I have read the journal's policy and the authors of this manuscript have the following competing interests: [insert competing interests here]*

\* typeset

**Ethics Statement**

Enter an ethics statement for this submission. This statement is required if the study involved:

- Human participants
- Human specimens or tissue
- Vertebrate animals or cephalopods
- Vertebrate embryos or tissues
- Field research

Write "N/A" if the submission does not require an ethics statement.

General guidance is provided below. Consult the [submission guidelines](#) for detailed instructions. **Make sure that all information entered here is included in the Methods section of the manuscript.**

The study was conducted according to the guidelines of the Declaration of Helsinki, and approved by the Malawi College of Medicine Research Ethics Committee of Kamuzu University of Health Sciences (Reg No: P.03/21/3277) and the World Health Organization Research Ethics Review Committee (Protocol ID: CERC.0104). Informed consent was obtained from all participants involved in the study.

**Format for specific study types**

**Human Subject Research (involving human participants and/or tissue)**

- Give the name of the institutional review board or ethics committee that approved the study
- Include the approval number and/or a statement indicating approval of this research
- Indicate the form of consent obtained (written/oral) or the reason that consent was not obtained (e.g. the data were analyzed anonymously)

**Animal Research (involving vertebrate animals, embryos or tissues)**

- Provide the name of the Institutional Animal Care and Use Committee (IACUC) or other relevant ethics board that reviewed the study protocol, and indicate whether they approved this research or granted a formal waiver of ethical approval
- Include an approval number if one was obtained
- If the study involved *non-human primates*, add *additional details* about animal welfare and steps taken to ameliorate suffering
- If anesthesia, euthanasia, or any kind of animal sacrifice is part of the study, include briefly which substances and/or methods were applied

**Field Research**

Include the following details if this study involves the collection of plant, animal, or other materials from a natural setting:

- Field permit number
- Name of the institution or relevant body that granted permission

**Data Availability**

Authors are required to make all data underlying the findings described fully available, without restriction, and from the time of publication. PLOS allows rare exceptions to address legal and ethical concerns. See the [PLOS Data Policy](#) and [FAQ](#) for detailed information.

Yes - all data are fully available without restriction

A Data Availability Statement describing where the data can be found is required at submission. Your answers to this question constitute the Data Availability Statement and **will be published in the article**, if accepted.

**Important:** Stating 'data available on request from the author' is not sufficient. If your data are only available upon request, select 'No' for the first question and explain your exceptional situation in the text box.

Do the authors confirm that all data underlying the findings described in their manuscript are fully available without restriction?

**Describe where the data may be found in full sentences. If you are copying our sample text, replace any instances of XXX with the appropriate details.**

- If the data are **held or will be held in a public repository**, include URLs, accession numbers or DOIs. If this information will only be available after acceptance, indicate this by ticking the box below. For example: *All XXX files are available from the XXX database (accession number(s) XXX, XXX).*
- If the data are all contained **within the manuscript and/or Supporting Information files**, enter the following: *All relevant data are within the manuscript and its Supporting Information files.*
- If neither of these applies but you are able to provide **details of access elsewhere**, with or without limitations, please do so. For example:

*Data cannot be shared publicly because of [XXX]. Data are available from the XXX Institutional Data Access / Ethics Committee (contact via XXX) for researchers who meet the criteria for access to confidential data.*

*The data underlying the results presented in the study are available from (include the name of the third party*

The trial protocol and dataset supporting the conclusions of this article are available via the London School of Hygiene & Tropical Medicine Data Compass <https://datacompass.lshtm.ac.uk/>

*and contact information or URL).*

- This text is appropriate if the data are owned by a third party and authors do not have permission to share the data.

\* typeset

Additional data availability information:

1 **COVID-19 self-testing using antigen rapid diagnostic tests: feasibility evaluation among**  
2 **health-care workers and general population in Malawi**

3 **Short title: COVID-19 self-testing**

4 Madalo Mukoka,<sup>1,\*</sup> Euphemia Sibanda<sup>2</sup>, Constancia Watadzaushe<sup>2</sup>, Moses Kumwenda<sup>1, 3</sup>,  
5 Florence Abok<sup>4</sup>, Elizabeth L. Corbett<sup>5</sup>, Elena Ivanova<sup>4</sup>, Augustine Talumba Choko<sup>3</sup>

- 6 1. Department of Pathology, Helse-Nord Tuberculosis Initiative, Kamuzu University of  
7 Health Sciences, Blantyre, Malawi
- 8 2. The Centre for Sexual Health and HIV/AIDS Research Zimbabwe, Harare, Zimbabwe
- 9 3. Public Health and Policy group, Malawi Liverpool Wellcome Trust Clinical Research  
10 Programme, Blantyre, Malawi
- 11 4. Foundation for Innovative New Diagnostics, Geneva, Switzerland
- 12 5. Clinical Research Department, London School of Hygiene & Tropical Medicine, London,  
13 UK

14 **\*Correspondence to:**

15 Madalo Mukoka

16 E-mail: madalo.mukoka@gmail.com (MM)

17 Mobile phone: +265 (0) 888 518 464

18

19

20

21

22

23

24

25 **Abstract**

26 **Background:** COVID-19 testing is critical for identifying cases to prevent transmission. SARS-  
27 CoV-2 self-testing has the potential to increase diagnostic testing capacity and to expand access  
28 to hard-to-reach areas in low-and-middle-income countries. We investigated the feasibility and  
29 acceptability of COVID-19 self-sampling and self-testing using SARS-CoV-2 Antigen-Rapid  
30 Diagnostic Tests (Ag-RDTs).

31 **Methods:** July 2021 to February 2022, we conducted a mixed-methods cross-sectional study  
32 examining self-sampling and self-testing using Standard Q and Panbio COVID-19 Ag Rapid  
33 Test Device in Urban and rural Blantyre, Malawi. Health care workers and adults (18y+) in the  
34 general population were systematically sampled.

35 **Results:** Overall, 1,330 participants were enrolled of whom 674 (56.0%) were female with 664  
36 for self-sampling and 666 for self-testing. Mean age was 30.7y (standard deviation [SD] 9.6).  
37 Self-sampling usability threshold for Standard Q was 273/333 (82.0%: 95% CI 77.4% to 86.0%)  
38 and 261/331 (78.8%: 95% CI 74.1% to 83.1%) for Panbio. Self-testing threshold was 276/335  
39 (82.4%: 95% CI 77.9% to 86.3%) and 300/332 (90.4%: 95% CI 86.7% to 93.3%) for Standard Q  
40 and Panbio, respectively. Agreement between self-sample results and professional test results  
41 was 325/325 (100%) and 322/322 (100%) for Standard Q and Panbio, respectively. For self-  
42 testing, agreement was 332/333 (99.7%: 95% CI 98.3 to 100%) for Standard Q and 330/330  
43 (100%: 95% CI 99.8 to 100%) for Panbio. Odds of achieving self-sampling threshold increased  
44 if the participant was recruited from an urban site (odds ratio [OR] 2.15 95% CI 1.44 to 3.23,  $P <$   
45 .01. Compared to participants with primary school education those with secondary and tertiary  
46 achieved higher self-testing threshold OR 1.88 (95% CI 1.17 to 3.01),  $P = .01$  and 4.05 (95% CI  
47 1.20 to 13.63),  $P = .02$ , respectively.



48 **Conclusions:** One of the first studies to demonstrate high feasibility of self-testing using SARS-  
49 CoV-2 Ag-RDTs in low- and middle-income countries potentially supporting large scale-up.

50

51

## 52 **Introduction**

53 Only around 0.2% of people in Africa had tested for severe acute respiratory syndrome coronavirus  
54 2 (SARS-CoV-2) the infection that causes COVID-19 in August 2020.[1] By contrast, 19.5% of  
55 Americans had tested by the same time[1] since COVID-19 emergence in December 2019.[2, 3]  
56 These contrasting trends have continued to exist with widening unequal access to testing, treatment  
57 and vaccination between high income countries and low and middle income countries despite four  
58 or more global epidemic waves.[4] Testing remains the most critical step for identification and  
59 isolation of COVID-19 cases to prevent transmission. [5] In many resource-limited settings,  
60 demand for tests often exceeds supply[6], hence there is need to improve diagnostic capacity.  
61 SARS-CoV-2 rapid antigen tests (Ag-RDTs) are recommended to complement nucleic acid  
62 amplification tests (NAAT) for diagnosis[7], which in resource-limited settings are often hard to  
63 implement because they require specialised skills and limited centralized laboratory capacity,  
64 associated with long turnaround times, and high costs to both the health system and patients.

65 COVID-19 self-testing was strongly recommended by the World Health Organization (WHO) in  
66 March 2022 as an additional strategy to complement professionally administered testing  
67 services.[8] Self-testing, which has been successfully used in other disease areas such as HIV  
68 where uptake is ubiquitously high including among hard to reach and key populations.[9-11] In  
69 general, COVID-19 self-testing has the potential to increase diagnostic capacity for COVID-19  
70 and reduce access barriers as well as prevailing inequalities due to ease of distribution and being  
71 extremely convenient.[12] However, COVID-19 self-testing has so far been widely implemented  
72 and made available in high income countries.[12-14] As with HIV self-testing, lack of linkage  
73 for next steps with COVID-19 is a potential concern due to stigma, loss of economic  
74 opportunities due to isolation implications, and fear of complications including death.

75 Being able to self-test rests on the assumption that individuals would be able to take their own  
76 sample (self-sampling).[15] However, in settings with low exposure to technology and the ability  
77 to correctly follow instructions such assumptions may be faulty.[16] Thus, early work including  
78 optimization of instructions for use through iterative cognitive interviews is essential to ensure  
79 correct use of self-tests.[16] Here we investigated the feasibility and acceptability of COVID-19  
80 self-sampling and self-testing using SARS-CoV-2 Ag-rapid diagnostics tests (RDTs) in Malawi.

81

## 82 **Materials and Methods**

### 83 Study design

84 A mixed-methods cross-sectional study examining self-sampling and self-testing for COVID-19  
85 using STANDARD Q COVID-19 Ag Test (SD Biosensor) and Panbio COVID-19 Ag Rapid Test  
86 Device (Abbott Rapid Diagnostics). We conducted the study under five components. These are:  
87 cognitive interviews to refine instructions for use (IFUs) for self-sampling, observational cross-  
88 sectional study of self-sampling, cognitive interviews to refine instructions for use for self-testing,  
89 observational cross-sectional study of self-testing, and in-depth interviews (IDIs) to understand  
90 participant views on self-sampling and self-testing.

### 91 **Setting**

92 Recruitment was conducted between July 2021 to February 2022 from Lirangwe Primary Health  
93 Centre from rural Blantyre and from Queen Elizabeth Central Hospital (QECH) from urban  
94 Blantyre, Malawi.

95

96 Participants

97 We recruited health care workers and members of the general public from the recruitment sites.  
98 To be eligible, participants needed to be 18 years or older, feeling well enough to comfortably  
99 conduct study activities, not having recent history of excessive nose bleeds, and having given  
100 consent. All health workers from the two health facilities were offered the choice to participate in  
101 the study with exclusion only done if ineligible. An additional eligibility criteria which was later  
102 relaxed due to scarcity of participants with waning wave concerned individuals being on the list  
103 to be tested for COVID-19 by the national systems. General public participants were  
104 systematically sampled from outpatient departments. An anterior nasal swab for COVID-19 was  
105 done for both self-sampling and self-testing following a short in-person demonstration by a  
106 member of staff.

107 Participants were observed in-person during self-sampling and self-testing, and a checklist (S1-  
108 S4 appendix) was completed to document whether each task was done correctly. A trained  
109 researcher then tested the collected sample using a COVID-19 Ag RDT during the self-sampling  
110 component of the study. Participants tested their own collected sample during the self-testing  
111 component of the study. The trained researcher collected and tested an anterior nasal  
112 confirmatory sample using an Ag RDT during both the self-sampling and self-testing  
113 components.

114 Variables

115 For the cognitive interviews, the main output was to have refined IFUs in the local language  
116 (Chichewa) and in English. The first primary outcome was the percentage of participants who  
117 attained a usability threshold for self-sampling, defined as correct execution of all critical

118 instructions during the self-sampling process for each kit. Correct self-sampling was referred to  
119 as self-sampling accuracy. The second primary outcome was the percentage of participants who  
120 attained a usability threshold for self-testing, defined as correct execution of all critical  
121 instructions during the self-testing process. Correct self-testing was referred to as self-testing  
122 accuracy. User views regarding self-sampling and self-testing were the main outcomes from the  
123 IDIs. Potential confounders for accuracy were age, sex, literacy and prior exposure to COVID-19  
124 testing.

125 Data sources/ measurement

126 Qualitative data from cognitive interviews and IDIs were tape recorded before being translated  
127 and transcribed. Pre- and post-test questionnaires were administered in-person using Open Data  
128 Kit (ODK) loaded on tablets. A checklist (S1-S4 appendix) was completed by a member of staff  
129 to document whether each instruction was done correctly as a measure of accuracy. Results  
130 obtained by a trained researcher from testing the collected self-sample and a sample collected by  
131 the researcher were recorded on the checklist. For self-testing accuracy, participant's self-test self-  
132 read results were compared to RDT sampling and testing conducted by the researcher. Participants'  
133 reading of pre-made cassettes of negative, positive and invalid results was also recorded.

134 **Bias**

135 The main source of bias is in the assessment by the research staff using a checklist of the  
136 performance of the participant on the IFU. A staff member who was more punitive may have  
137 harshly rated performance as incorrect while a more forgiving one may have rated performance  
138 differently. However, the fact that more than seven staff members were involved in the rating  
139 may have minimized such bias.

## 140 Study size

141 We aimed to recruit and purposively sample 120 participants for cognitive interviews for self-  
142 sampling and self-testing for both test kits. For self-sampling and self-testing, we conservatively  
143 assumed that 70% to 80% of participants will be able to correctly follow instructions and self-  
144 sample or self-test for COVID-19. For the sample proportion to be estimated to within  $\pm 0.05$   
145 (5%) using the 95% confidence level, a sample of 323 participants were required. Thus, a total of  
146 1,320 participants were needed: 330 per test kit for self-sampling and self-testing. A purposive  
147 sample of 120 participants was needed for the IDIs: 60 self-sampling and 60 self-testing  
148 participants.

## 149 Quantitative variables

150 A binary variable was generated for the first and secondary primary outcomes of achieving the  
151 threshold (accuracy) for either self-sampling or self-testing. This was coded as 1 for participants  
152 with a maximum score on the critical steps based on the checklist and 0 otherwise. Test result  
153 variables were coded as 1 for positive and 0 for negative.

## 154 **Statistical methods**

155 Analysis used R[17] with 0.05 as an indicator of statistical significance. Frequencies were  
156 computed for categorical variables while mean and standard deviation (SD) or median and (inter  
157 quartile range) were computed for continuous variables that were normally distributed or  
158 skewed, respectively. We computed the proportion achieving accuracy along with Binomial  
159 Exact confidence intervals (CIs) for self-sampling and self-testing for each test kit. Similarly, we  
160 computed the proportion of self-test results that agreed with staff conducted RDT test results

161 along with Binomial Exact confidence intervals (CIs) for each test kit. Logistic regression was  
162 used to examine factors associated with accuracy.

163

#### 164 **Ethics Statement**

165 The study was conducted according to the guidelines of the Declaration of Helsinki, and  
166 approved by the Malawi College of Medicine Research Ethics Committee of Kamuzu University  
167 of Health Sciences (Reg No: P.03/21/3277) and the World Health Organization Research Ethics  
168 Review Committee (Protocol ID: CERC.0104). Informed consent was obtained from all  
169 participants involved in the study.

170

171

172

173

174

175

176

177

178

179

180 **Results**

181 Participants and Descriptive data

182 A total of 120 participants were recruited for self-sampling and self-testing cognitive interviews.  
183 Of 723 screened for eligibility 664 (91.8%) were recruited for self-sampling with mean age of  
184 31.4y (standard deviation [SD]: 9.8) and 357/664 (53.8%) were male (Table 1). For self-testing,  
185 666 (95.4%) were recruited of 698 screened for eligibility; mean age was 30.6y (standard  
186 deviation [SD]: 9.6) with 293/666 (44.0%) being male (Table 2). The main exclusion was being  
187 under 18 years. Sixty participants were recruited for IDIs.

188 Outcome data

189 The cognitive interviews showed that participants in both rural and urban communities were able  
190 to follow the IFUs with no major suggestions for changes. Notable changes to IFUs included:  
191 making introductory text stand out to catch attention, enhancing clarity of IFUs such as by  
192 expanding text, adding labels on images, selecting words or phrases that could be well understood  
193 locally. Insertion of test swab to correct depth (1.5cm or 2cm) was illustrated by reference to  
194 inserting up to thumbnail depth.

195



196 **Table 1. Baseline Characteristics: Self-sampling**

| Variable                              | Characteristic       | Overall       | Standard Q    | Panbio         | p-value <sup>a</sup> |
|---------------------------------------|----------------------|---------------|---------------|----------------|----------------------|
| Number of participants                | n                    | 664           | 331           | 333            |                      |
| Sex                                   | Male                 | 357 (53.8)    | 176 (53.2)    | 181 (54.4)     | 0.820                |
|                                       | Female               | 307 (46.2)    | 155 (46.8)    | 152 (45.6)     |                      |
| Age (years)                           | mean (SD)            | 31.4 (9.8)    | 31.8 (10.3)   | 31.0 (9.3)     | 0.313                |
| Ever tested for COVID-19?             | No                   | 568 (87.0)    | 303 (91.8)    | 265 (82.0)     | <0.001               |
|                                       | Yes                  | 85 (13.0)     | 27 (8.2)      | 58 (18.0)      |                      |
| Marital status                        | Divorced             | 37 ( 5.7)     | 20 ( 6.1)     | 17 ( 5.3)      | 0.512                |
|                                       | Separated            | 33 ( 5.1)     | 15 ( 4.5)     | 18 ( 5.6)      |                      |
|                                       | Widowed              | 14 ( 2.1)     | 8 ( 2.4)      | 6 ( 1.9)       |                      |
|                                       | Never married        | 180 (27.6)    | 82 (24.8)     | 98 (30.3)      |                      |
|                                       | Married              | 389 (59.6)    | 205 (62.1)    | 184 (57.0)     |                      |
| Money earned per month (MWK)          | mean (SD)            | 68191 (96060) | 57471 (90035) | 79111 (100803) | 0.004                |
| Able to read a newspaper?             | No                   | 42 ( 6.4)     | 29 ( 8.8)     | 13 ( 4.0)      | 0.020                |
|                                       | Yes                  | 610 (93.6)    | 300 (91.2)    | 310 (96.0)     |                      |
| Highest level of formal schooling     | Never been to school | 25 ( 3.9)     | 18 ( 5.5)     | 7 ( 2.2)       | <0.001               |
|                                       | Primary              | 165 (25.4)    | 101 (31.0)    | 64 (19.8)      |                      |
|                                       | Secondary no MSCE    | 216 (33.3)    | 118 (36.2)    | 98 (30.3)      |                      |
|                                       | Secondary with MSCE  | 131 (20.2)    | 54 (16.6)     | 77 (23.8)      |                      |
|                                       | Tertiary             | 112 (17.3)    | 35 (10.7)     | 77 (23.8)      |                      |
| Number of people in household         | mean (SD)            | 4.2 (1.8)     | 4.2 (1.8)     | 4.2 (1.8)      | 0.903                |
| Number of rooms in household          | mean (SD)            | 2.5 (1.0)     | 2.4 (1.0)     | 2.6 (1.1)      | 0.032                |
| Number of households per dwelling     | mean (SD)            | 1.5 (1.3)     | 1.3 (0.8)     | 1.7 (1.7)      | <0.001               |
| Enough food / essentials for 14 days? | No                   | 412 (63.1)    | 215 (65.2)    | 197 (61.0)     | 0.307                |
|                                       | Yes                  | 241 (36.9)    | 115 (34.8)    | 126 (39.0)     |                      |
| Recruitment site                      | QECH                 | 331 (49.8)    | 165 (49.8)    | 166 (49.8)     | 1.000                |
|                                       | Lirangwe             | 333 (50.2)    | 166 (50.2)    | 167 (50.2)     |                      |

197 <sup>a</sup>Chisquare test for categorical variables; t-test for continuous variables

198 SD: standard deviation; QECH: Queen Elizabeth Central Hospital

199

200

201 **Table 2. Baseline Characteristics: Self-testing**  
 202

| Variable                              | Characteristic       | Overall        | Standard Q     | Panbio        | p-value <sup>a</sup> |
|---------------------------------------|----------------------|----------------|----------------|---------------|----------------------|
| Number of participants                | n                    | 664            | 336            | 328           |                      |
| Sex                                   | Male                 | 292 (44.0)     | 138 (41.1)     | 154 (47.0)    | 0.148                |
|                                       | Female               | 372 (56.0)     | 198 (58.9)     | 174 (53.0)    |                      |
| Age (years)                           | mean (SD)            | 30.7 (9.6)     | 30.8 (9.8)     | 30.52 (9.3)   | 0.724                |
| Ever tested for COVID-19?             | No                   | 603 (91.5)     | 303 (91.0)     | 300 (92.0)    | 0.659                |
|                                       | Yes                  | 56 (8.5)       | 30 (9.0)       | 26 (8.0)      |                      |
| Marital status                        | Divorced             | 37 ( 5.6)      | 15 ( 4.5)      | 22 ( 6.8)     | 0.208                |
|                                       | Separated            | 47 ( 7.2)      | 24 ( 7.2)      | 23 ( 7.1)     |                      |
|                                       | Widowed              | 25 ( 3.8)      | 13 ( 3.9)      | 12 ( 3.7)     |                      |
|                                       | Never married        | 195 (29.7)     | 88 (26.5)      | 107 (32.9)    |                      |
|                                       | Married              | 353 (53.7)     | 192 (57.8)     | 161 (49.5)    |                      |
| Money earned per month (MWK)          | mean (SD)            | 67802 (123668) | 70359 (153192) | 65190 (83531) | 0.591                |
| Able to read a newspaper?             | No                   | 59 ( 8.9)      | 29 ( 8.7)      | 30 ( 9.2)     | 0.922                |
|                                       | Yes                  | 601 (91.1)     | 305 (91.3)     | 296 (90.8)    |                      |
| Highest level of formal schooling     | Never been to school | 33 ( 5.0)      | 19 ( 5.7)      | 14 ( 4.3)     | 0.209                |
|                                       | Primary              | 208 (31.5)     | 109 (32.6)     | 99 (30.4)     |                      |
|                                       | Secondary no MSCE    | 220 (33.3)     | 117 (35.0)     | 103 (31.6)    |                      |
|                                       | Secondary with MSCE  | 143 (21.7)     | 68 (20.4)      | 75 (23.0)     |                      |
|                                       | Tertiary             | 56 ( 8.5)      | 21 ( 6.3)      | 35 (10.7)     |                      |
| Number of people in household         | mean (SD)            | 4.2 (1.6)      | 4.2 (1.7)      | 4.3 (1.6)     | 0.548                |
| Number of rooms in household          | mean (SD)            | 2.5 (1.2)      | 2.5 (1.0)      | 2.5 (1.4)     | 0.559                |
| Number of households per dwelling     | mean (SD)            | 1.5 (1.3)      | 1.5 (1.6)      | 1.5 (0.9)     | 0.516                |
| Enough food / essentials for 14 days? | No                   | 351 (53.3)     | 188 (56.5)     | 163 (50.0)    | 0.113                |
|                                       | Yes                  | 308 (46.7)     | 145 (43.5)     | 163 (50.0)    |                      |
| Recruitment site                      | QECH                 | 334 (50.8)     | 169 (51.1)     | 165 (50.6)    | 0.971                |
|                                       | Lirangwe             | 323 (49.2)     | 162 (48.9)     | 161 (49.4)    |                      |

203 Main results

204 Self-sampling accuracy was 273/333 (82.0%: 95% CI: 77.4 to 86.0) for Standard Q and 261/331

205 (78.8: 95% CI: 74.1% to 83.1%) for Panbio (Table 3). The percentage agreement between the test

206 results from the participant and the study staff was 100% for both kits in Malawi (Table 3).

207 Self-testing accuracy was 276/335 (82.4%: 95% CI: 77.9 to 86.3) for Standard Q and 300/332

208 (90.4%: 95% CI: 86.7 to 93.3) for Panbio (Table 3). The percentage agreement between the test

209 results from the participant and the study staff was 99.7% (95% CI: 98.3-100%) for Standard Q

210 with only one false negative self-test self-read result.

211 **Table 3. Self-sampling and Self-testing Accuracy**

|                                          | Standard Q |     |      |        | Panbio |     |     |      |        |      |
|------------------------------------------|------------|-----|------|--------|--------|-----|-----|------|--------|------|
|                                          | N          | n   | %    | 95% CI |        | N   | n   | %    | 95% CI |      |
| Met self-sampling threshold <sup>a</sup> | 333        | 273 | 82.0 | 77.4   | 86.0   | 331 | 261 | 78.8 | 74     | 83.1 |
| Met self-testing threshold               | 335        | 276 | 82.4 | 77.9   | 86.3   | 332 | 300 | 90.4 | 86.7   | 93.3 |
| Agreement with professional test         |            |     |      |        |        |     |     |      |        |      |
| Self-sampling                            | 322        | 322 | 100  | 99     | 100    | 325 | 325 | 100  | 100    | 100  |
| Self-testing                             | 333        | 332 | 99.7 | 98     | 100    | 330 | 330 | 100  | 100    | 100  |

212 <sup>a</sup>Threshold: participant performing all critical steps correctly

213 CI: confidence interval

214

215 Up to 95% of the critical steps were performed correctly on either test kit for both self-sampling  
 216 and self-testing (Table 4).

217 **Table 4. User errors for Standard Q and PanBio kits**

|                                                                                                                       | Standard Q (N = 331) |          | Panbio (N = 331) |          |
|-----------------------------------------------------------------------------------------------------------------------|----------------------|----------|------------------|----------|
|                                                                                                                       | Yes                  | No       | Yes              | No       |
| Did the participant place the tube on the kit box tray holder or flat surface correctly?                              | 327 (97.6)           | 8 (2.4)  | 329 (99.4)       | 2 (0.6)  |
| Did participant insert the swab into the left nostril to the correct depth (about 1.5cm or 2cm)?                      | 327 (97.6)           | 8 (2.4)  | 332 (100)        | 0 (0.0)  |
| Did the participant rotate the swab 5 or 10 times in the left nostril?                                                | 325 (97.0)           | 10 (3.0) | 327 (98.5)       | 5 (1.5)  |
| Did participant insert the swab into the right nostril to the correct depth (about 1.5cm or 2cm)?                     | 327 (98.5)           | 5 (1.5)  | 329 (99.4)       | 2 (0.6)  |
| Did the participant rotate the swab 5 or 10 times in the right nostril?                                               | 324 (97.0)           | 10 (3.0) | 330 (99.4)       | 2 (0.6)  |
| Did the participant insert the swab into the solution tube correctly?                                                 | 331 (98.8)           | 4 (1.2)  | 328 (99.4)       | 2 (0.6)  |
| Did the participant swirl in the fluid 5 or 10 times while pushing against the wall of the tube?                      | 325 (97.3)           | 9 (2.7)  | 323 (97.6)       | 8 (2.4)  |
| Did the participant remove the swab slowly while squeezing the sides of the tube to extract the liquid from the swab? | 310 (92.5)           | 25 (7.5) | 316 (95.5)       | 15 (4.5) |
| Did the participant press the nozzle cap tightly the tube?                                                            | 326 (97.9)           | 7 (2.1)  | 330 (99.7)       | 1 (0.3)  |
| Did the participant squeeze 4 or 5 drops of liquid from the tube into the well on the test device?                    | 319 (95.5)           | 15 (4.5) | 330 (99.7)       | 1 (0.3)  |
| Did the participant read the test result in 15 minutes?                                                               | 333 (99.7)           | 1 (0.3)  | 325 (97.9)       | 7 (2.1)  |
| Did the participant interpret the test result correctly?                                                              | 328 (98.5)           | 2 (1.5)  | 329 (99.7)       | 1 (0.3)  |

218 Standard Q: swab 10 times, depth 2cm, 4 drops

219

220 The odds of self-sampling accuracy increased 2-fold for participants from QECH compared to  
 221 participants from Lirangwe primary health centre odds ratio (OR) 2.15 (95% CI 1.44 to 3.23,  $P <$   
 222 0.1 (Table 5). There appeared to be a linear trend towards increased odds of attaining self-testing  
 223 accuracy with increasing levels of education,  $P$  for trend 0.01.

224 **Table 5. Factors associated with self-sampling and self-testing accuracy**

| Variable                             | Characteristic             | Self-sampling (N = 641) |        |      |         | Self-testing (N = 637) |        |       |         |
|--------------------------------------|----------------------------|-------------------------|--------|------|---------|------------------------|--------|-------|---------|
|                                      |                            | Unadjusted              |        |      |         | Unadjusted             |        |       |         |
|                                      |                            | OR                      | 95% CI |      | p-value | OR                     | 95% CI |       | p-value |
| Age                                  | Yearly increase            | 0.99                    | 0.97   | 1.01 | 0.247   | 0.99                   | 0.97   | 1.01  | 0.299   |
| Sex                                  | Female                     | 1.00                    |        |      |         | 1.00                   |        |       |         |
|                                      | Male                       | 1.00                    | 0.68   | 1.48 | 0.991   | 0.84                   | 0.54   | 1.33  | 0.459   |
| Site                                 | Lirangwe                   | 1.00                    |        |      |         | 1.00                   |        |       |         |
|                                      | QECH                       | 2.15                    | 1.44   | 3.23 | <0.001  | 1.47                   | 0.93   | 2.32  | 0.097   |
| Literacy                             | No                         | 1.00                    |        |      |         | 1.00                   |        |       |         |
|                                      | Yes                        | 0.57                    | 0.22   | 1.49 | 0.251   | 1.21                   | 0.57   | 2.55  | 0.625   |
| Highest level of education attained? | Primary school             | 1.00                    |        |      |         | 1.00                   |        |       |         |
|                                      | Never been school          | 2.75                    | 0.61   | 12.3 | 0.186   | 1.67                   | 0.55   | 5.02  | 0.362   |
|                                      | Secondary                  | 0.91                    | 0.58   | 1.44 | 0.686   | 1.88                   | 1.17   | 3.01  | 0.009   |
|                                      | Tertiary                   | 2.09                    | 1.03   | 4.25 | 0.041   | 4.05                   | 1.20   | 13.63 | 0.024   |
| Marital Status                       | Divorced/separated/widowed | 1.00                    |        |      |         | 1.00                   |        |       |         |
|                                      | Never married              | 2.10                    | 1.06   | 4.14 | 0.033   | 2.41                   | 1.26   | 4.61  | 0.008   |
|                                      | Married                    | 1.07                    | 0.61   | 1.89 | 0.820   | 1.89                   | 1.09   | 3.28  | 0.023   |
| Ever tested for COVID-19?            | No                         | 1.00                    |        |      |         | 1.00                   |        |       |         |
|                                      | Yes                        | 1.04                    | 0.58   | 1.86 | 0.905   | 1.25                   | 0.52   | 3.02  | 0.619   |

225 OR: odds ratio; CI: confidence interval; QECH: Queen Elizabeth Central Hospital

226

227 Other analyses

228 Nearly all in-depth interview participants reported that self-testing was highly acceptable because

229 it was convenient, empowering and private.

230 Most participants had no problems interpreting contrived panel results with 99% correctly

231 interpreting positive and negative results correctly although 96% correctly interpreted invalid

232 results on either test kit (S5 Table). Up to 90.7% Standard Q and 96.1% Panbio participants

233 found instructions “not at all hard” when asked on exit interviews (S6 Table).

234

## 235 **Discussion**

### 236 Key results

237 This is one of first studies to be conducted on COVID-19 self-testing in low- and middle-income  
238 countries and generally indicates that participants in both rural and urban communities in Malawi  
239 can self-test correctly for COVID-19. The results of this study show that 82% and 90% of  
240 participants were able to self-test for COVID-19 with no supervision following a brief  
241 demonstration using Standard Q and PanBio test kits, respectively. Of further note, all self-test  
242 results agreed 100% with professionally conducted RDTs for PanBio kit whereas agreement was  
243 99.7% for Standard Q. Similarly, 82% of participants were able to correctly self-sample for  
244 COVID-19 using Standard Q compared to 79% using PanBio. COVID-19 self-testing was rated  
245 as highly acceptable during in-depth interviews.

246 Current strategies for COVID-19 testing in high income countries are largely dependent on Ag-  
247 RDT self-sampling and self-testing[18-20] with over-the-counter self-test kits available for  
248 purchase in a wide range of countries.[14, 21] The limited data available in resource-poor settings  
249 suggest that, as with HIV self-testing, diagnostic accuracy is not as great with untrained lay users  
250 as with trained professionals, mainly affecting sensitivity.[13, 18, 22] Our results on the other  
251 hand show that self-testing accuracy improved markedly with a short demonstration supporting  
252 previous findings observed with HIV self-testing.[10, 23] Our study investigated self-testing with  
253 two kits that were already approved for use in Malawi. However, there are numerous Ag-RDT  
254 tests packaged for COVID-19 self-testing that have met performance standards and been approved  
255 by Regulatory Authorities such as the FDA, that may yield similar promising results.[24, 25]

256

### 257 Limitations

258 There are notable limitations with our study. Firstly, there was a small number of positive self-  
259 test results. Although this does not affect the reading of correct results and indeed completing  
260 critical steps correctly as assessed here it may be important as it is likely to affect sensitivity.[26]  
261 Reassuringly, up to 99% of participants correctly interpreted contrived positive results on either  
262 kit. Secondly, there was potential for assessment bias resulting from subjective judgement on the  
263 checklist used by research staff for assessing performance of the participant on each instruction.  
264 The impact of this bias could be bi-directional depending on whether the staff was harsh –  
265 leading to poor rating, or more lenient resulting in more participants being passed as correctly  
266 following instructions.

#### 267 Generalisability

268 This study demonstrates high acceptability and feasibility of COVID-19 self-testing.[8] The  
269 findings are very similar to results reported in other self-testing areas including HIV[27] and  
270 hepatitis C virus (HCV)[28]. Thus, we posit that the findings are generalizable to many resource  
271 settings and populations including those with limited literacy. However, some support may be  
272 useful for specific settings and users – such as older age groups and those with lower literacy.  
273 Lessons learned from introduction and scale-up of other self-testing approaches such as HIV and  
274 HCV may be applicable here to accelerate adaptation plans and efforts in LMIC.

#### 275 Conclusions

276 This is one the first studies to demonstrate high usability and acceptability self-testing using  
277 SARS-CoV-2 Ag-RDTs among both general and health-care worker populations in low- and  
278 middle-income countries. While most users collected their own samples and self-tested with  
279 ease, participants noted demonstrations were helpful and could be important in some settings and

280 populations, such as older age groups and those with low literacy levels. COVID-19 self-testing  
281 is an important strategy for further consideration as it may be a promising tool for increasing  
282 access to and uptake of COVID-19 testing services as well as strategies to reduce transmission  
283 and linkage to further care, treatment and support services.

#### 284 **Acknowledgements**

285 The authors would like to thank all study participants, participating health facilities, and project  
286 team members for their contributions to the successful completion of this project.

#### 287 **Authors' contributions**

288 Conceptualization, MM, ES, CW, MK, FA, ELC, EI and ATC; Data curation, MM and AC;  
289 Formal analysis, MM, ES, MK and AC; Funding acquisition, ES, FA, EC, EI and AC;  
290 Investigation, MM, ES, CW, MK, FA and AC; Methodology, MM, ES, CW, MK, FA and AC;  
291 Project administration, MM, ES, CW, MK, FA, EC, EI and AC; Resources, MM, EI and AC;  
292 Supervision, ES, MK, FA, EC, EI and AC; Validation, MM, ES, EC, EI and AC; Visualization,  
293 ES and AC; Writing – original draft, MM and AC; Writing – review & editing, ES, CW, MK,  
294 FA, EC and EI.

295

#### 296 **Data Availability statement**

297 The trial protocol and dataset supporting the conclusions of this article are available via the  
298 London School of Hygiene & Tropical Medicine Data Compass <https://datacompass.lshtm.ac.uk/>

299



300 **References**

- 301 1. Chitungo I, Dzobo M, Hlongwa M, Dzinamarira T. COVID-19: Unpacking the low  
302 number of cases in Africa. *Public health in practice* (Oxford, England). 2020;1:100038. Epub  
303 2021/06/27. doi: 10.1016/j.puhip.2020.100038. PubMed PMID: 34173573; PubMed Central  
304 PMCID: PMCPMC7485446.
- 305 2. World Health Organization. WHO-convened global study of origins of SARS-CoV-2:  
306 China Part. Joint WHO-China Study Team report: 14 January-10 February 2021. Geneva,  
307 Switzerland: WHO, 2021.
- 308 3. Zoumpourlis V, Goulielmaki M, Rizos E, Baliou S, Spandidos DA. [Comment] The  
309 COVID- 19 pandemic as a scientific and social challenge in the 21st century. *Molecular*  
310 *medicine reports*. 2020;22(4):3035-48. Epub 2020/09/19. doi: 10.3892/mmr.2020.11393.  
311 PubMed PMID: 32945405; PubMed Central PMCID: PMCPMC7453598.
- 312 4. Zhang SX, Arroyo Marioli F, Gao R, Wang S. A Second Wave? What Do People Mean  
313 by COVID Waves? - A Working Definition of Epidemic Waves. *Risk management and*  
314 *healthcare policy*. 2021;14:3775-82. Epub 2021/09/23. doi: 10.2147/rmhp.S326051. PubMed  
315 PMID: 34548826; PubMed Central PMCID: PMCPMC8448159.
- 316 5. World Health Organization. Contact tracing in the context of COVID-19 Geneva,  
317 Switzerland: WHO; 2021 [cited 2022 21 Jan 2022]. Available from:  
318 <https://www.who.int/publications/i/item/contact-tracing-in-the-context-of-covid-19>.
- 319 6. Boum Y, Eyangoh S, Okomo MC. Beyond COVID-19-will self-sampling and testing  
320 become the norm? *The Lancet Infectious diseases*. 2021;21(9):1194-5. Epub 2021/04/16. doi:  
321 10.1016/s1473-3099(21)00197-3. PubMed PMID: 33857408; PubMed Central PMCID:  
322 PMCPMC8041358.
- 323 7. Drain PK. Rapid Diagnostic Testing for SARS-CoV-2. *The New England journal of*  
324 *medicine*. 2022;386(3):264-72. Epub 2022/01/08. doi: 10.1056/NEJMcp2117115. PubMed  
325 PMID: 34995029.
- 326 8. World Health Organization. Use of SARS-CoV-2 antigen-detection rapid diagnostic tests  
327 for COVID-19 self-testing. Interim guidance. Geneva, Switzerland: WHO, 2022.
- 328 9. Indravudh PP, Choko AT, Corbett EL. Scaling up HIV self-testing in sub-Saharan Africa:  
329 a review of technology, policy and evidence. *Current opinion in infectious diseases*.  
330 2018;31(1):14-24. Epub 2017/12/13. doi: 10.1097/qco.0000000000000426. PubMed PMID:  
331 29232277; PubMed Central PMCID: PMCPMC5768229.
- 332 10. Choko AT, Desmond N, Webb EL, Chavula K, Napierala-Mavedzenge S, Gaydos CA, et  
333 al. The uptake and accuracy of oral kits for HIV self-testing in high HIV prevalence setting: a  
334 cross-sectional feasibility study in Blantyre, Malawi. *PLoS medicine*. 2011;8(10):e1001102. doi:  
335 10.1371/journal.pmed.1001102. PubMed PMID: 21990966; PubMed Central PMCID:  
336 PMC3186813.
- 337 11. Johnson CC, Kennedy C, Fonner V, Siegfried N, Figueroa C, Dalal S, et al. Examining  
338 the effects of HIV self-testing compared to standard HIV testing services: a systematic review  
339 and meta-analysis. *Journal of the International AIDS Society*. 2017;20(1):21594. doi:

- 340 10.7448/IAS.20.1.21594. PubMed PMID: 28530049; PubMed Central PMCID:  
341 PMCPMC5515051.
- 342 12. Stohr J, Zwart VF, Goderski G, Meijer A, Nagel-Imming CRS, Kluytmans-van den  
343 Bergh MFQ, et al. Self-testing for the detection of SARS-CoV-2 infection with rapid antigen  
344 tests for people with suspected COVID-19 in the community. *Clinical microbiology and  
345 infection : the official publication of the European Society of Clinical Microbiology and  
346 Infectious Diseases*. 2021. Epub 2021/08/08. doi: 10.1016/j.cmi.2021.07.039. PubMed PMID:  
347 34363945; PubMed Central PMCID: PMCPMC8336990.
- 348 13. Lindner AK, Nikolai O, Rohardt C, Kausch F, Wintel M, Gertler M, et al. Diagnostic  
349 accuracy and feasibility of patient self-testing with a SARS-CoV-2 antigen-detecting rapid test.  
350 *Journal of clinical virology : the official publication of the Pan American Society for Clinical  
351 Virology*. 2021;141:104874. Epub 2021/06/19. doi: 10.1016/j.jcv.2021.104874. PubMed PMID:  
352 34144452; PubMed Central PMCID: PMCPMC8163726.
- 353 14. NHS; UK. Your step-by-step guide to DHSC COVID-19 Self-Test (Rapid Antigen Test).  
354 NHS Test and Trace: NHS, 2022.
- 355 15. Lindner AK, Nikolai O, Rohardt C, Burock S, Hülso C, Bölke A, et al. Head-to-head  
356 comparison of SARS-CoV-2 antigen-detecting rapid test with professional-collected nasal versus  
357 nasopharyngeal swab. *The European respiratory journal*. 2021;57(5). Epub 2021/02/13. doi:  
358 10.1183/13993003.04430-2020. PubMed PMID: 33574072; PubMed Central PMCID:  
359 PMCPMC7877326.
- 360 16. Simwinga M, Kumwenda MK, Dacombe RJ, Kayira L, Muzumara A, Johnson CC, et al.  
361 Ability to understand and correctly follow HIV self-test kit instructions for use: applying the  
362 cognitive interview technique in Malawi and Zambia. *Journal of the International AIDS Society*.  
363 2019;22 Suppl 1(Suppl Suppl 1):e25253. Epub 2019/03/26. doi: 10.1002/jia2.25253. PubMed  
364 PMID: 30907496; PubMed Central PMCID: PMCPMC6432102.
- 365 17. R Core Team. R: A language and environment for statistical computing. R Foundation for  
366 Statistical Computing. Vienna, Austria: 2022.
- 367 18. Wachinger J, Olaru ID, Horner S, Schnitzler P, Heeg K, Denking CM. The potential of  
368 SARS-CoV-2 antigen-detection tests in the screening of asymptomatic persons. *Clinical  
369 microbiology and infection : the official publication of the European Society of Clinical  
370 Microbiology and Infectious Diseases*. 2021;27(11):1700.e1-.e3. Epub 2021/07/30. doi:  
371 10.1016/j.cmi.2021.07.020. PubMed PMID: 34325065; PubMed Central PMCID:  
372 PMCPMC8310783.
- 373 19. Young BC, Eyre DW, Kendrick S, White C, Smith S, Beveridge G, et al. Daily testing for  
374 contacts of individuals with SARS-CoV-2 infection and attendance and SARS-CoV-2  
375 transmission in English secondary schools and colleges: an open-label, cluster-randomised trial.  
376 *Lancet (London, England)*. 2021;398(10307):1217-29. Epub 2021/09/18. doi: 10.1016/s0140-  
377 6736(21)01908-5. PubMed PMID: 34534517; PubMed Central PMCID: PMCPMC8439620.
- 378 20. European Centre for Disease Prevention and Control. Considerations on the use of self-  
379 tests for COVID-19 in the EU/EEA – 17 March 2021. ECDC: Stockholm: 2021.

380 21. UK Government. Order coronavirus (COVID-19) rapid lateral flow tests  
381 <https://pubmed.ncbi.nlm.nih.gov/34959134/>; 2022  
382 [cited 2022 31 Jan 2022]. Available from: <https://pubmed.ncbi.nlm.nih.gov/34959134/>.

383 22. Lindner AK, Nikolai O, Rohardt C, Kausch F, Wintel M, Gertler M, et al. SARS-CoV-2  
384 patient self-testing with an antigen-detecting rapid test: a head-to-head comparison with  
385 professional testing. Preprint <https://www.medrxiv.org/content/101101/2021010620249009v1>.  
386 2021.

387 23. Choko AT, MacPherson P, Webb EL, Willey BA, Feasy H, Sambakunsi R, et al. Uptake,  
388 Accuracy, Safety, and Linkage into Care over Two Years of Promoting Annual Self-Testing for  
389 HIV in Blantyre, Malawi: A Community-Based Prospective Study. *PLoS medicine*.  
390 2015;12(9):e1001873. doi: 10.1371/journal.pmed.1001873. PubMed PMID: 26348035; PubMed  
391 Central PMCID: PMCPMC4562710.

392 24. Peeling RW, Olliaro PL, Boeras DI, Fongwen N. Scaling up COVID-19 rapid antigen  
393 tests: promises and challenges. *The Lancet Infectious diseases*. 2021;21(9):e290-e5. Epub  
394 2021/02/27. doi: 10.1016/s1473-3099(21)00048-7. PubMed PMID: 33636148; PubMed Central  
395 PMCID: PMCPMC7906660.

396 25. Foundation for Innovative New Diagnostics. Test directory [https://www.finddx.org/test-](https://www.finddx.org/test-directory/2022)  
397 [directory/2022](https://www.finddx.org/test-directory/) [cited 2022 31 Jan 2022]. Available from: <https://www.finddx.org/test-directory/>.

398 26. Altman DG, Bland JM. Diagnostic tests. 1: Sensitivity and specificity. *BMJ (Clinical*  
399 *research ed)*. 1994;308(6943):1552. Epub 1994/06/11. doi: 10.1136/bmj.308.6943.1552.  
400 PubMed PMID: 8019315; PubMed Central PMCID: PMCPMC2540489.

401 27. Pant Pai N, Sharma J, Shivkumar S, Pillay S, Vadnais C, Joseph L, et al. Supervised and  
402 unsupervised self-testing for HIV in high- and low-risk populations: a systematic review. *PLoS*  
403 *medicine*. 2013;10(4):e1001414. doi: 10.1371/journal.pmed.1001414. PubMed PMID:  
404 23565066; PubMed Central PMCID: PMCPMC3614510.

405 28. Reipold EI, Farahat A, Elbeeh A, Soliman R, Aza EB, Jamil MS, et al. Usability and  
406 acceptability of self-testing for hepatitis C virus infection among the general population in the  
407 Nile Delta region of Egypt. *BMC public health*. 2021;21(1):1188. Epub 2021/06/24. doi:  
408 10.1186/s12889-021-11169-x. PubMed PMID: 34158006; PubMed Central PMCID:  
409 PMCPMC8218412.

410

411

412

413

414

415

416

417 **S1 text**

- 418 1. S1 Checklist. Self-sampling checklist-Standard Q
  - 419 2. S2 Checklist. Self-sampling checklist-PanBio
  - 420 3. S3 Checklist. Self-testing checklist-Standard Q
  - 421 4. S4 Checklist Self-testing checklist-PanBio
  - 422 5. S5 Table. Interpreting contrived panel results
  - 423 6. S6 Table. User views on self-sampling and self-testing
- 424



Click here to access/download  
**Supporting Information**  
S1 Text.docx



Supplement: pone.0289291.s004.pdf [file pone.0289291.s004.pdf]
